# Supplementary material for: Eupalinolide J Inhibits Cancer Metastasis by Promoting STAT3 Ubiquitin-Dependent Degradation
Source: MDPI journal article supplement (doi:10.3390/molecules28073143), 2023-03-31
Supplement: s1 [file s1]

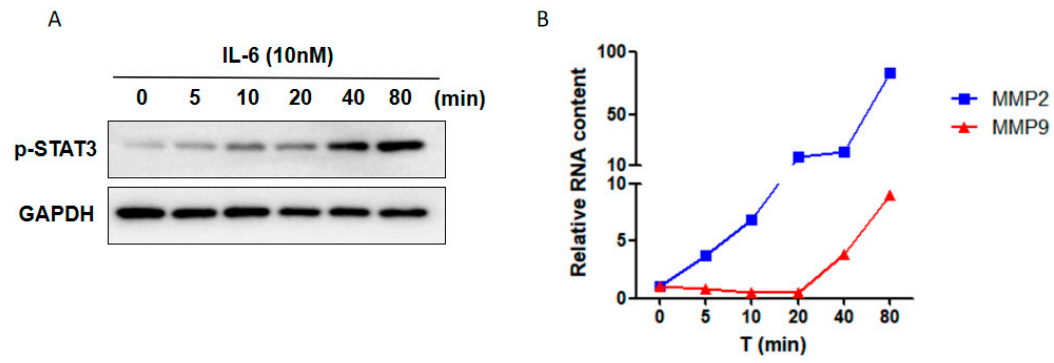

**Figure S1.** STAT3 activation induced the expression of MMP-2 and MMP-9 mRNA in MDA-MB-231 cells. A. IL-6 induces STAT3 activation in MDA-MB-231 cells; B. Changes of MMP-2 and MMP-9 mRNA over time in MDA-MB-231 cells after STAT3 activation.
